# Supplementary material for: Nitrite ion sensing properties of ZnTiO3–TiO2 composite thin films deposited from a zinc–titanium molecular complex
Source: Royal Society of Chemistry journal article supplement (doi:10.1039/c5nj00850f), 2015-01-01
Supplement: c5nj00850f1.pdf [file c5nj00850f1.pdf]

## **Electronic Supplementary Information**

### **Title: Nitrite ion sensing properties of ZnTiO<sub>3</sub>-TiO<sub>2</sub> composite thin films deposited from zinc-titanium molecular complex**

Authors: Muhammad Ali Ehsan,<sup>a</sup> Hamid Khaledi,<sup>a</sup> Alagarsamy Pandikumar,<sup>b</sup> Perumal Rameshkumar,<sup>b</sup> Nay Ming Huang,<sup>b</sup> Zainudin Arifin,<sup>a</sup> Muhammad Mazhar\*<sup>a</sup>

**Submitted to : New Journal of Chemistry**

| <b>List of Information</b>                                                        | <b>Page No.</b> |
|-----------------------------------------------------------------------------------|-----------------|
| Microanalysis of precursor ( <b>1</b> )                                           | 2               |
| FT-IR spectrum of precursor ( <b>1</b> )                                          | 2               |
| <sup>1</sup> H-NMR spectrum of precursor ( <b>1</b> )                             | 3               |
| XRD patterns of ZnTiO <sub>3</sub> -TiO <sub>2</sub> composite thin films         | 3-7             |
| SEM images of ZnTiO <sub>3</sub> -TiO <sub>2</sub> composite thin films           | 8               |
| EDX spectra of ZnTiO <sub>3</sub> -TiO <sub>2</sub> composite thin films          | 9-11            |
| Electrochemical plots of ZnTiO <sub>3</sub> -TiO <sub>2</sub> composite thin film | 11-13           |

### Elemental Analysis of $[\text{Zn}_2\text{Ti}_4(\mu\text{-O})_6(\text{TFA})_8(\text{THF})_6]\cdot\text{THF}$ (1)

|             |                           |         |               |
|-------------|---------------------------|---------|---------------|
| DATE & TIME | 7/1/2014 12:47:02 PM      | P_ID    | 20140701      |
| SAMPLE ID   | B3                        | USER ID | Administrator |
| WEIGHT (mg) | 1.913                     | MODE    | CHN           |
|             |                           | SIGNALS |               |
| CARBON      | 27.960%                   | ZR      | 9486          |
| HYDROGEN    | 2.877%                    | NR      | 9709          |
| NITROGEN    | 0.0%                      | CR      | 18474         |
| BLANKS      | -14    279    225         | HR      | 20513         |
| K FACTORS   | 16.413    37.908    5.872 |         |               |

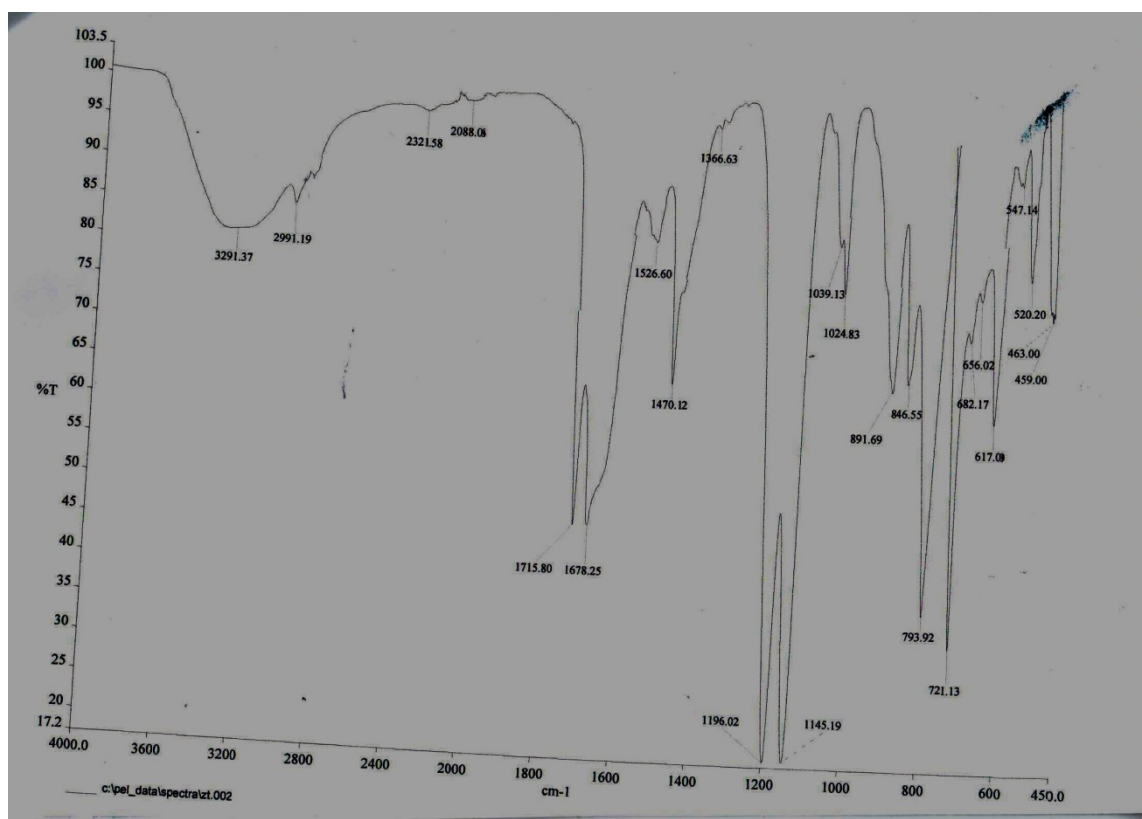

Fig. S1: FT-IR spectrum of precursor  $[\text{Zn}_2\text{Ti}_4(\mu\text{-O})_6(\text{TFA})_8(\text{THF})_6]\cdot\text{THF}$  (1).

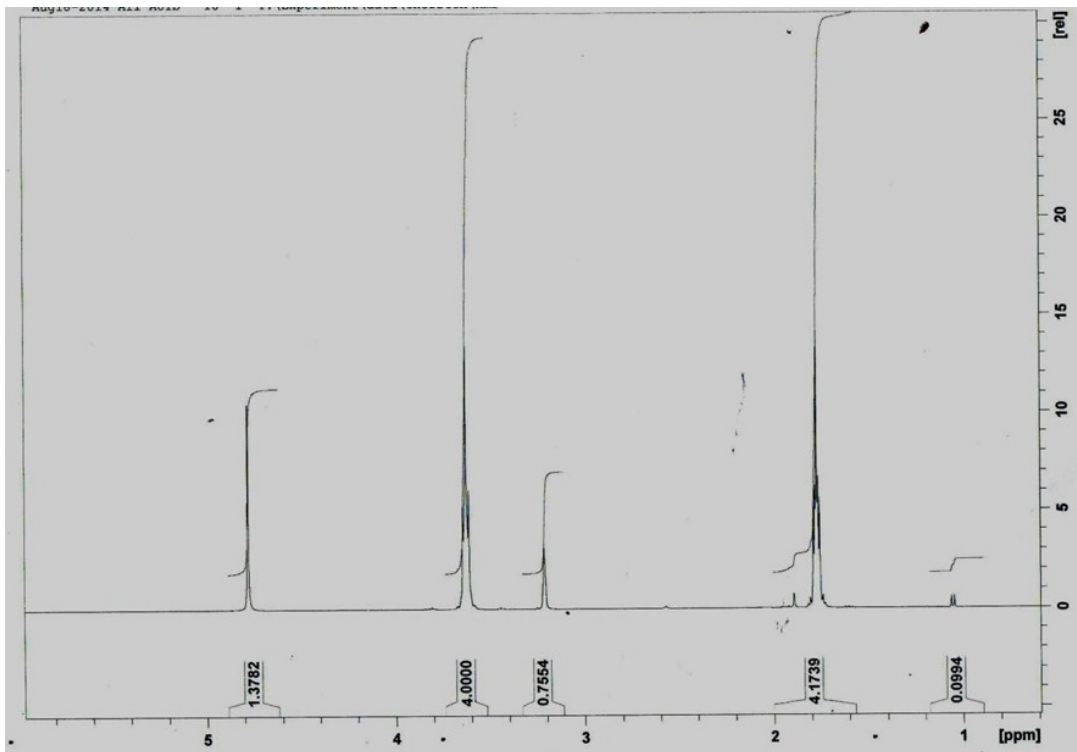

**Fig. S2:**  $^1\text{H-NMR}$  spectrum of precursor  $[\text{Zn}_2\text{Ti}_4(\mu\text{-O})_6(\text{TFA})_8(\text{THF})_6]\cdot\text{THF}$  (**1**).

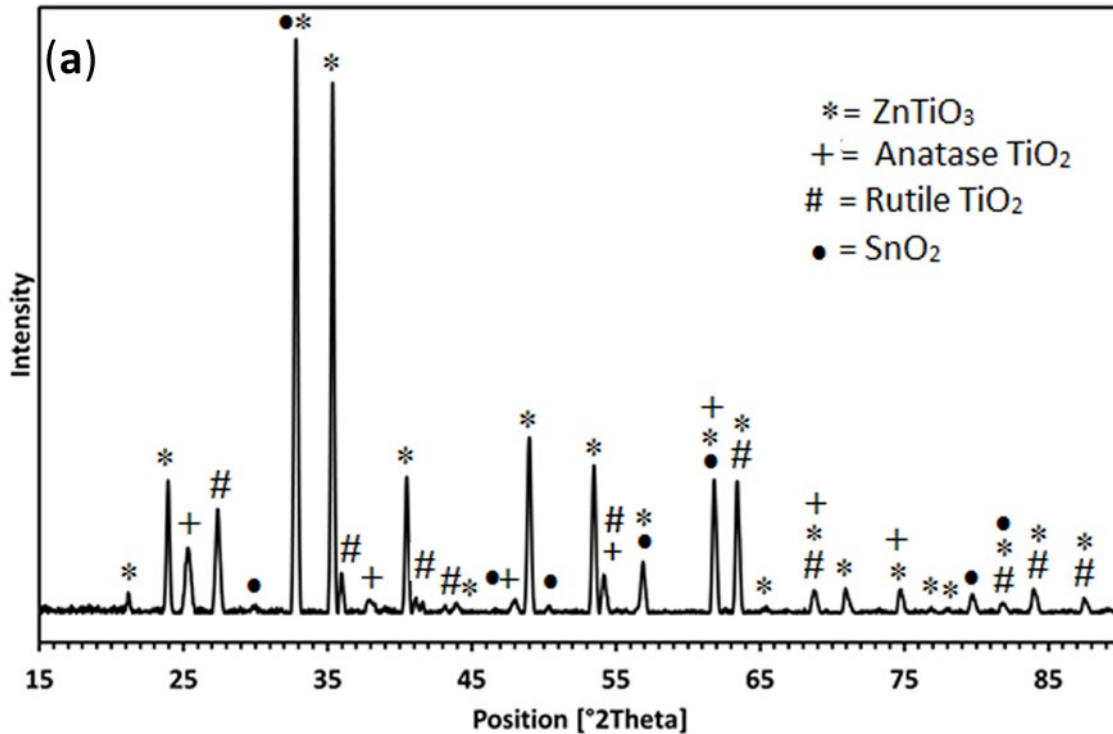

**Fig. S3a:** XRD pattern of  $\text{ZnTiO}_3\text{-TiO}_2$  composite thin film deposited from methanol solution of (**1**) on crystalline FTO glass substrate at  $550\text{ }^\circ\text{C}$ .

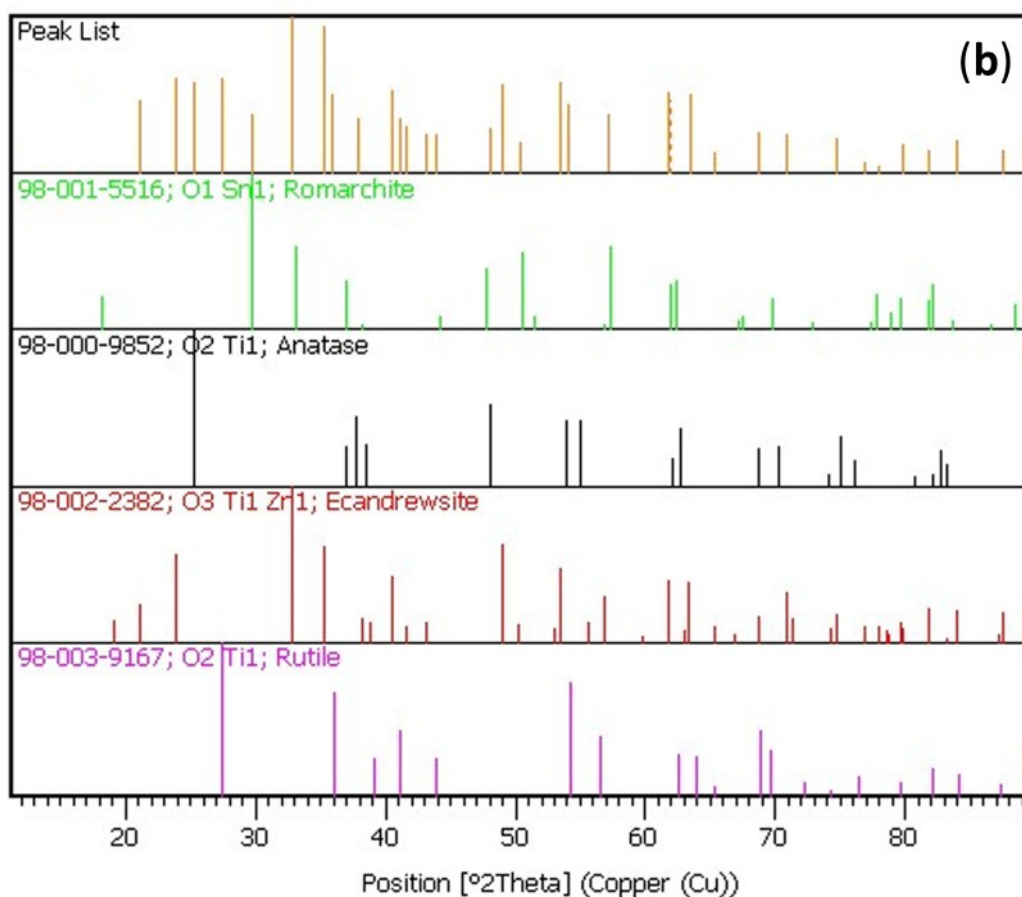

**Fig. S3b:** Comparisons of XRD patterns of ZnTiO<sub>3</sub>-TiO<sub>2</sub> composite thin film deposited from methanolic solution of (1) on crystalline FTO substrate with standard ICSD; SnO (green lines) (98-001-5516), anatase TiO<sub>2</sub> (black lines) (98-000-9852), ecandrewsite ZnTiO<sub>3</sub> (ICSD 98-002-2382) (red lines), rutile TiO<sub>2</sub> (violet lines) (98-003-9167).

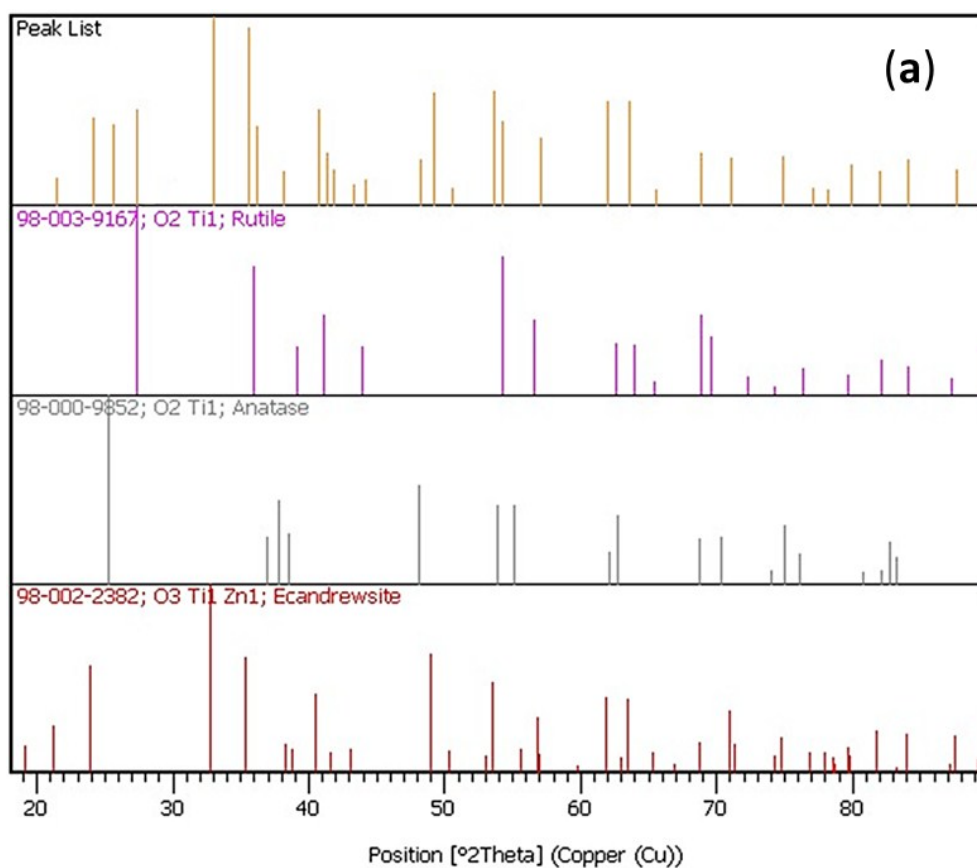

**Fig. S4a:** Comparisons of XRD pattern of ZnTiO<sub>3</sub>-TiO<sub>2</sub> composite thin film deposited from methanolic solution of (1) on plain glass with the standard ICSD; rutile TiO<sub>2</sub> (violet lines) (98-003-9167), anatase TiO<sub>2</sub> (grey lines) (98-000-9852) and ecandrewsite (red lines) ZnTiO<sub>3</sub> (ICSD 98-002-2382).

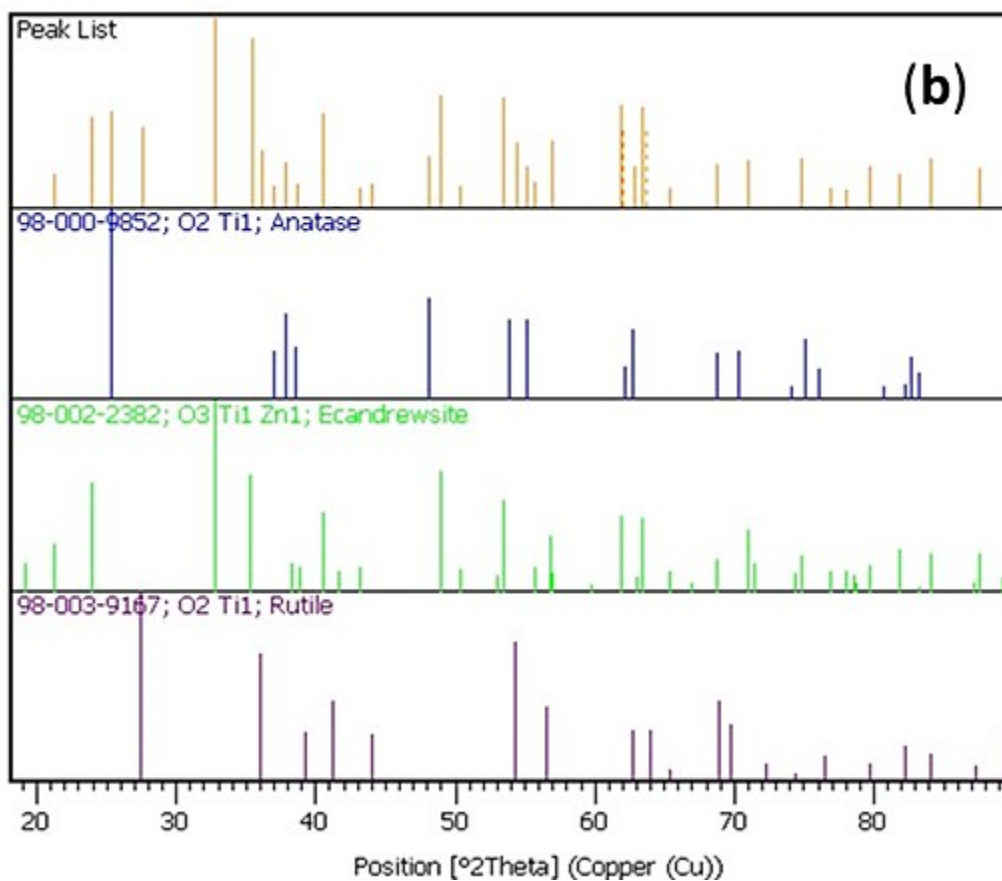

**Fig. S4b:** Comparisons of XRD patterns of ZnTiO<sub>3</sub>-TiO<sub>2</sub> composite thin film deposited from THF solution of (1) on plain glass with the standard ICSD; anatase TiO<sub>2</sub> (blue lines) (98-000-9852), ecandrewsite ZnTiO<sub>3</sub> (98-002-2382) (green lines), rutile TiO<sub>2</sub> (violet lines) (98-003-9167) .

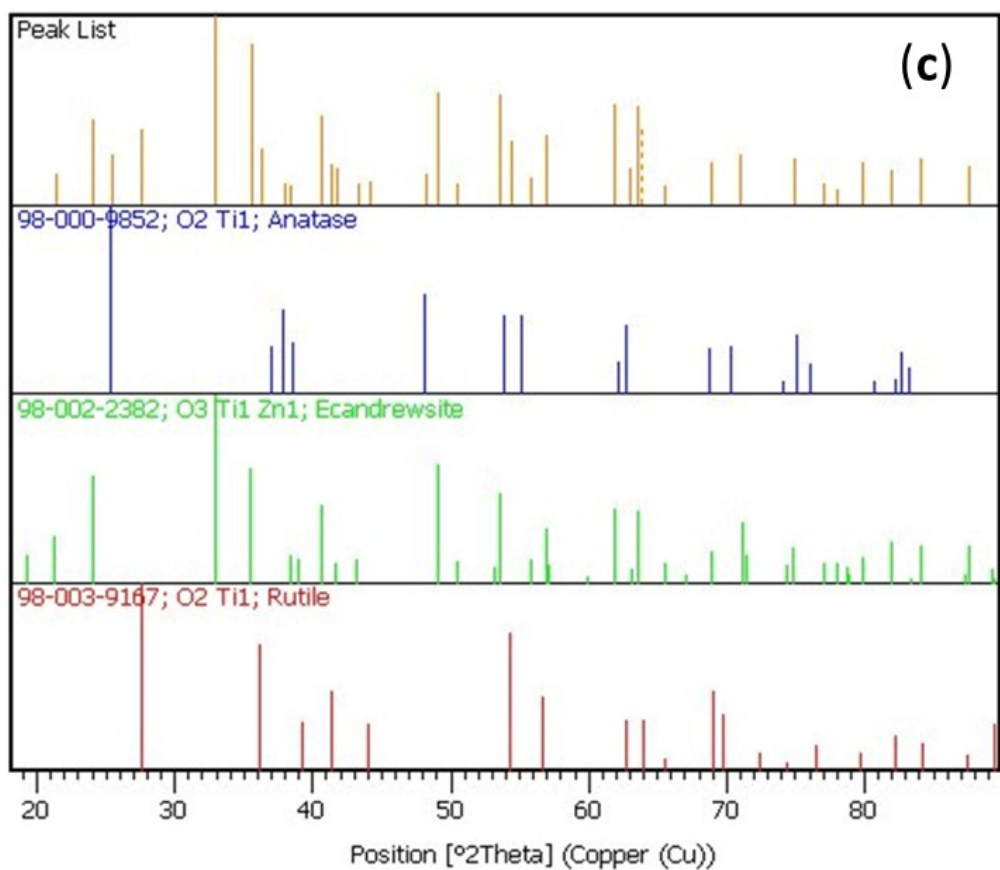

**Fig. S4c:** Comparisons of XRD pattern of ZnTiO<sub>3</sub>-TiO<sub>2</sub> composite thin film deposited from ACN solution of (1) on plain glass with the standard ICSD; anatase TiO<sub>2</sub> (blue lines) (98-000-9852), ecandrewsite ZnTiO<sub>3</sub> (98-002-2382) (green lines), rutile TiO<sub>2</sub> (violet lines) (98-003-9167) .

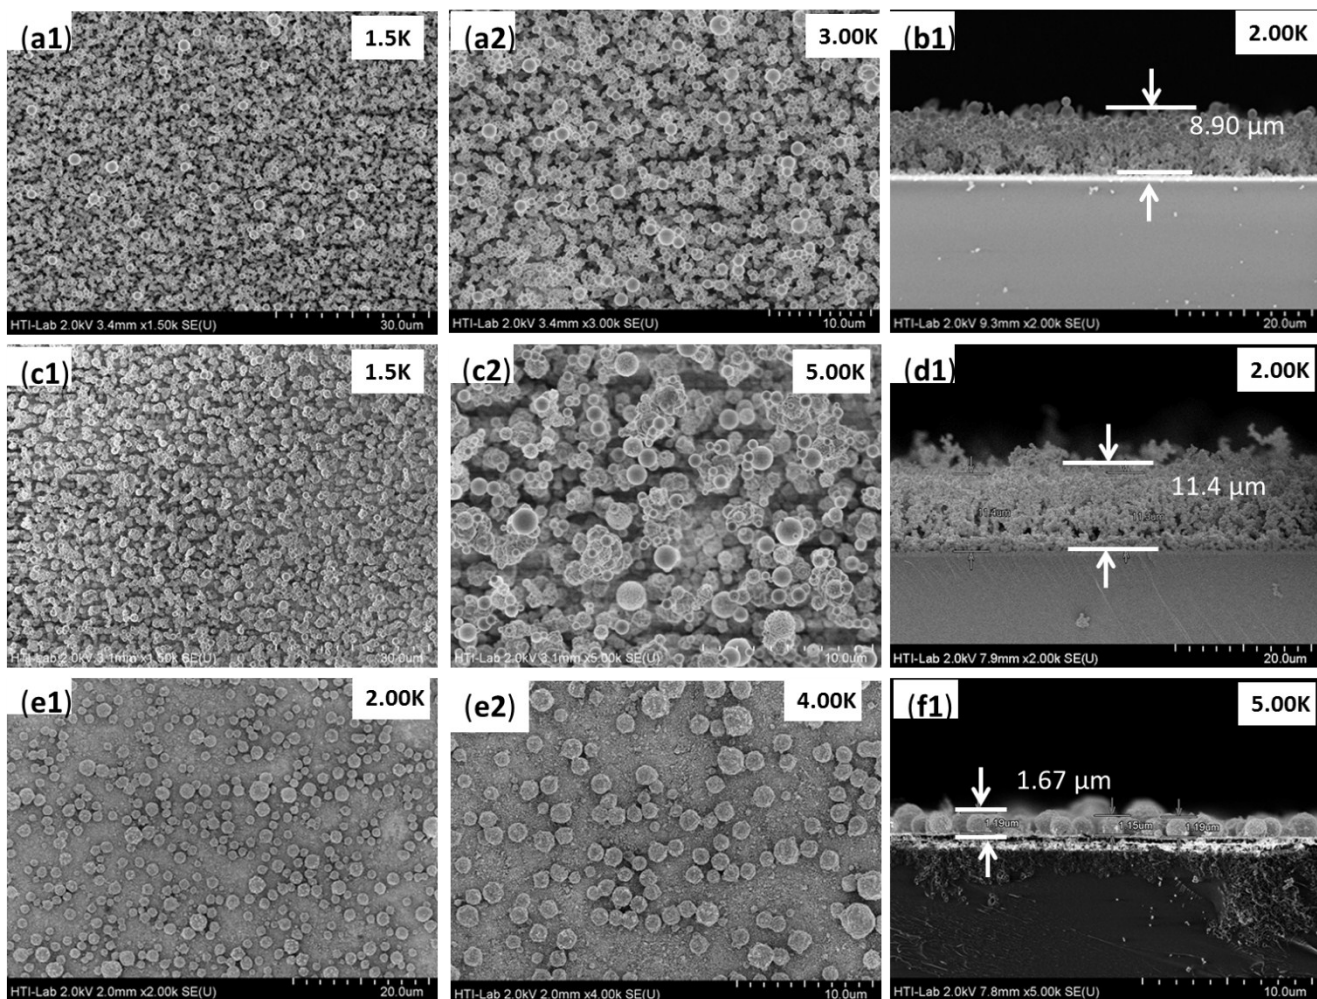

**Fig. S5 :** (a), (c) and (e) show surface ; (b), (d) and (f) indicate the cross section SEM images of  $\text{ZnTiO}_3\text{-TiO}_2$  composite thin films deposited on FTO glass substrate at  $550\text{ }^\circ\text{C}$  from solution of precursor (1) in (a, b) methanol (c, d) THF and (e, f) acetonitrile, respectively.



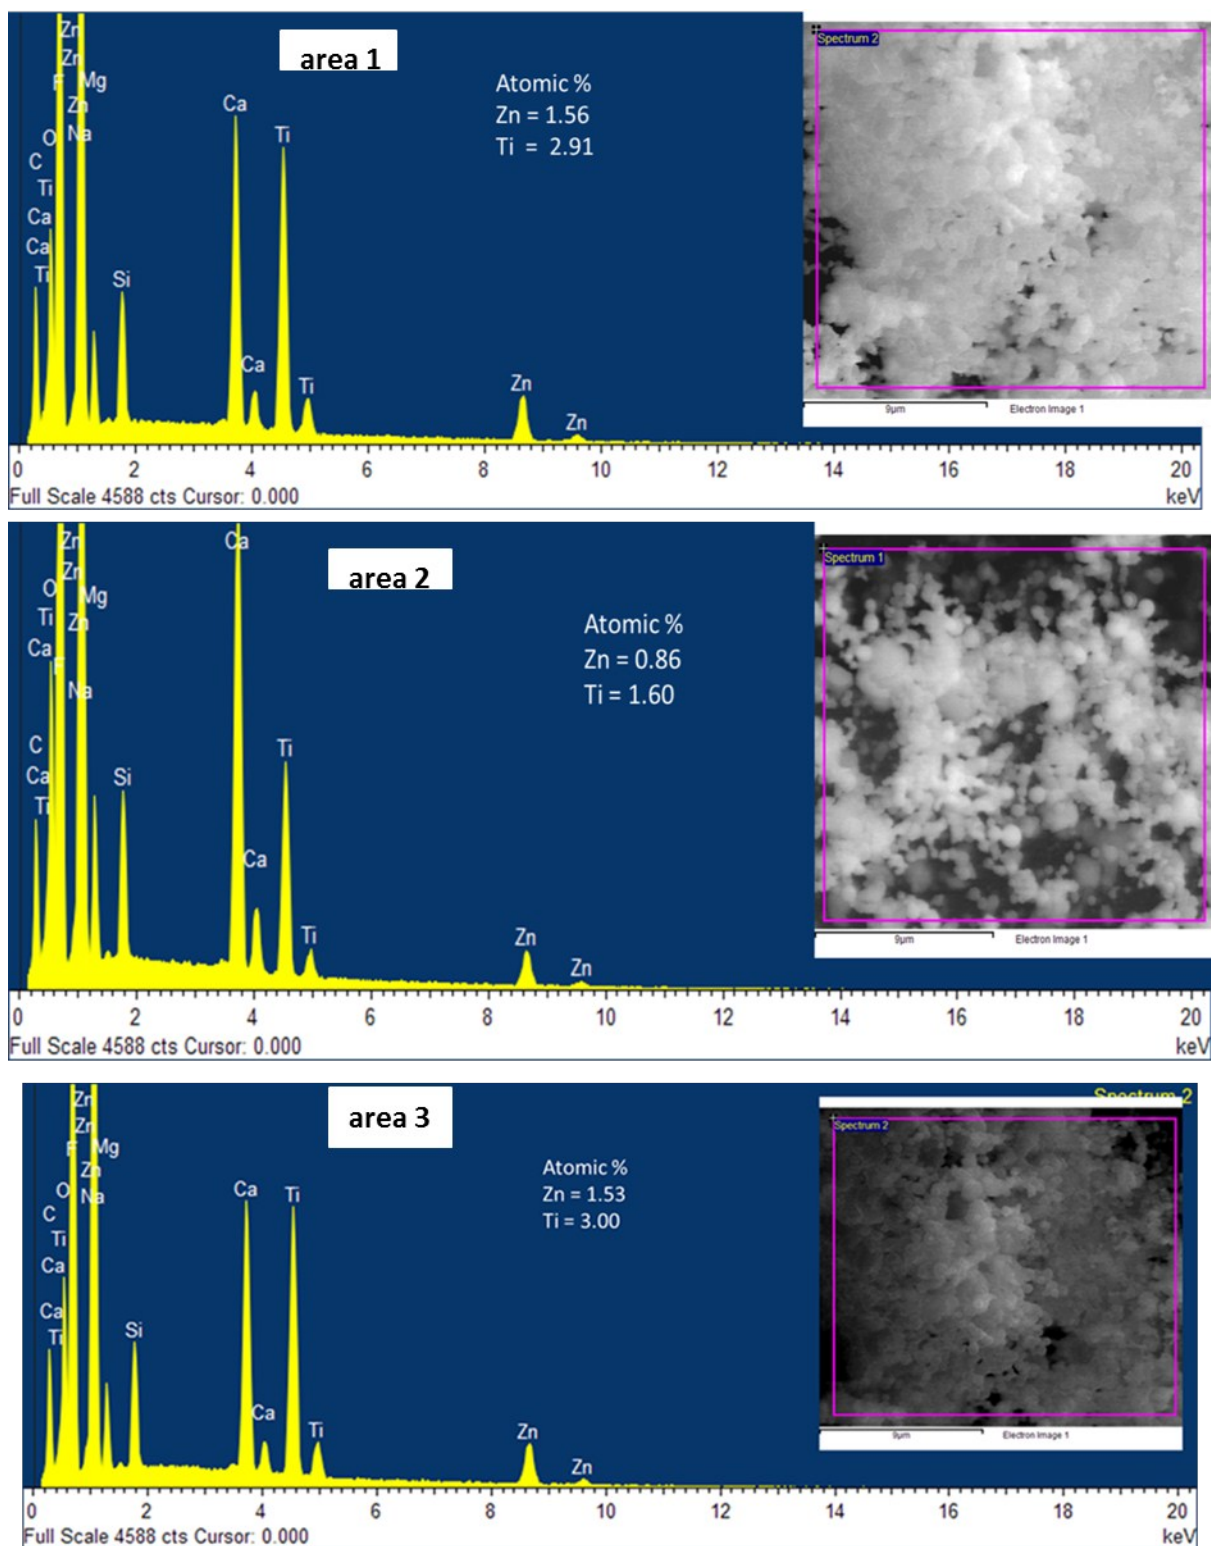

**Fig. S6:** EDX spectrum recorded from different areas of ZnTiO<sub>3</sub>-TiO<sub>2</sub> composite film deposited from methanol solution of (1) on FTO substrate at 550 °C in air atmosphere.

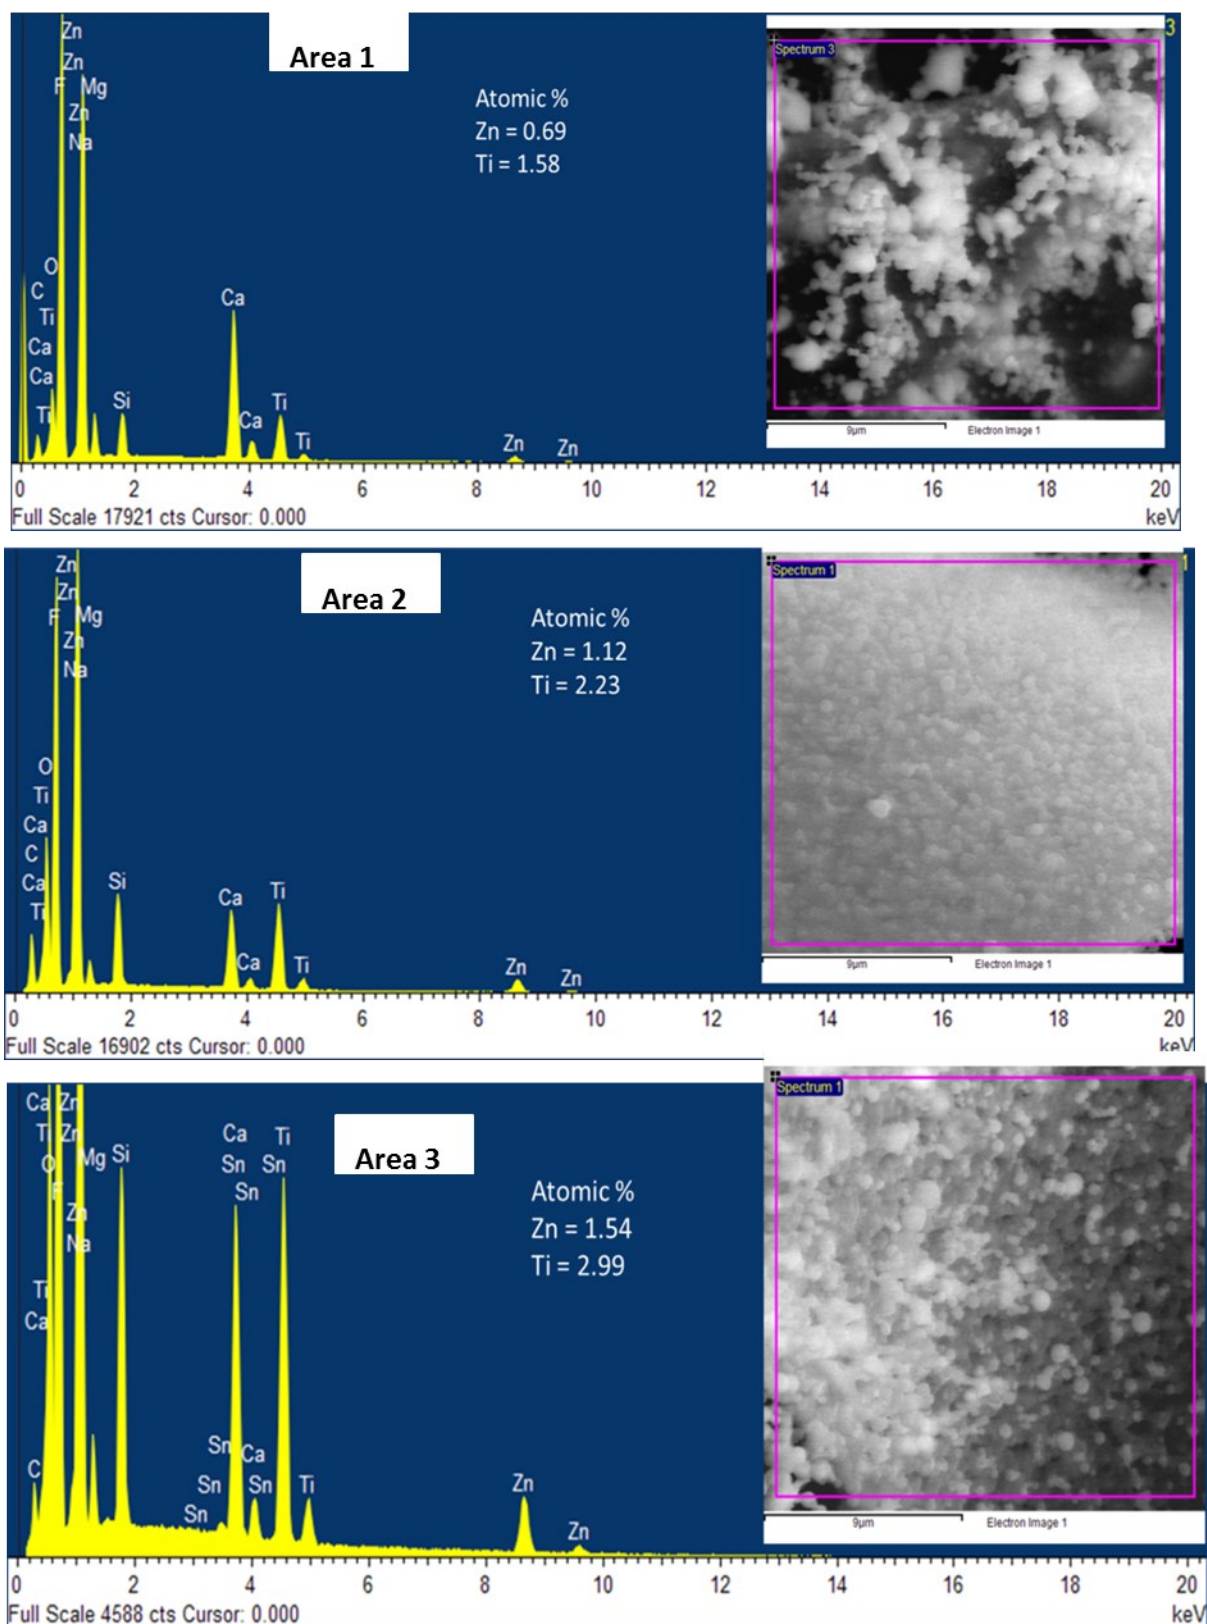

**Fig. S7:** EDX spectrum recorded from different areas of  $\text{ZnTiO}_3\text{-TiO}_2$  composite film deposited from THF solution of (1) on FTO substrate at  $550\text{ }^\circ\text{C}$  in air atmosphere.

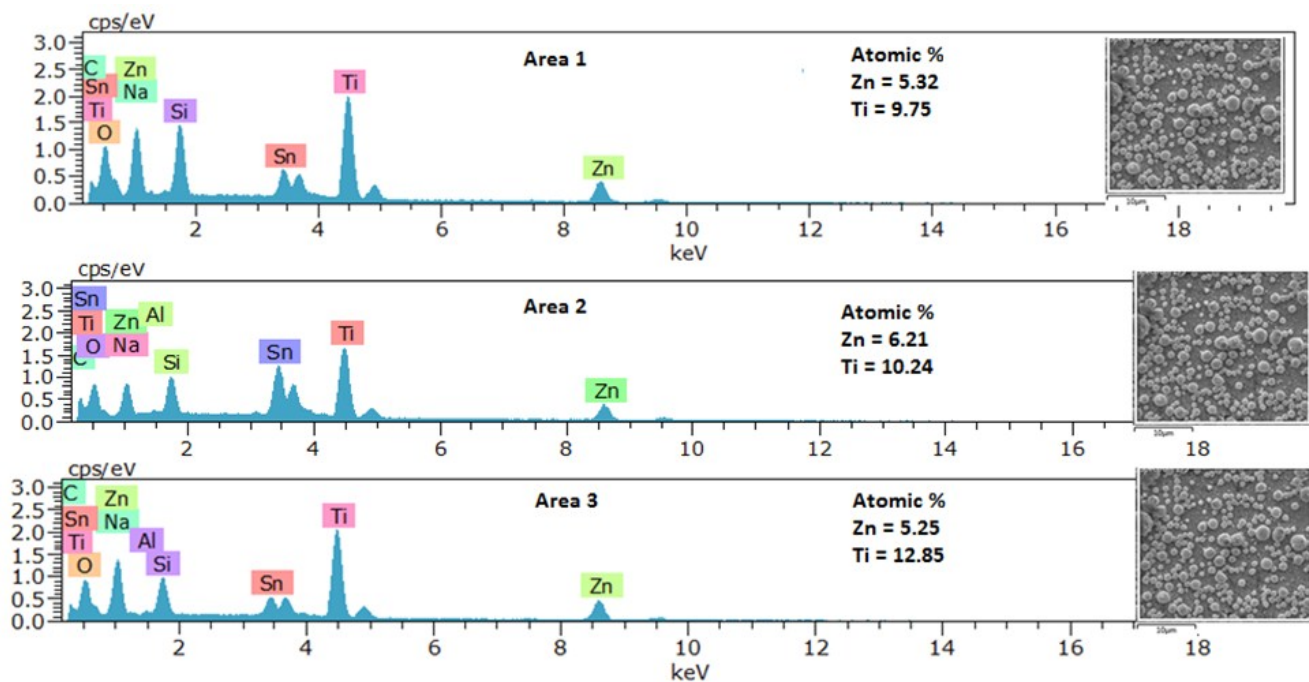

**Fig. S8:** EDX spectrum recorded from different areas of ZnTiO<sub>3</sub>-TiO<sub>2</sub> composite film deposited from ACN solution of (1) on FTO substrate at 550 °C in air atmosphere

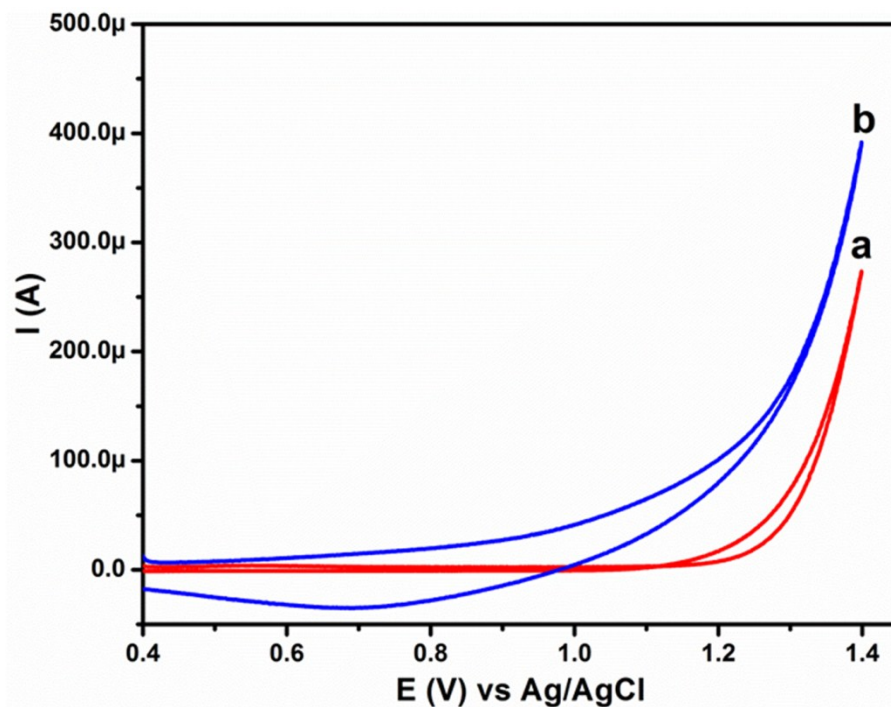

**Fig. S9:** Cyclic voltammograms obtained for the bare FTO electrode (a) absence and (b) presence of 1 mM nitrite in 0.1 M PBS (pH 7.2) at a scan rate of 50 mV s<sup>-1</sup>.

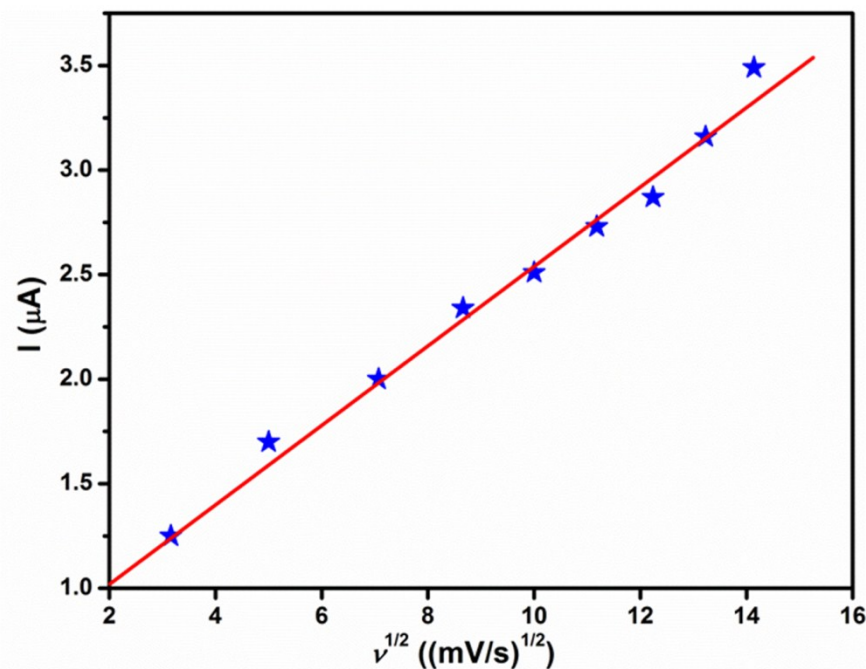

**Fig. S10:** Plot of peak current vs. square root of scan rate obtained for the ZnTiO<sub>3</sub>-TiO<sub>2</sub> composite thin film in the presence of 1 mM nitrite in 0.1 M PBS (pH 7.2).

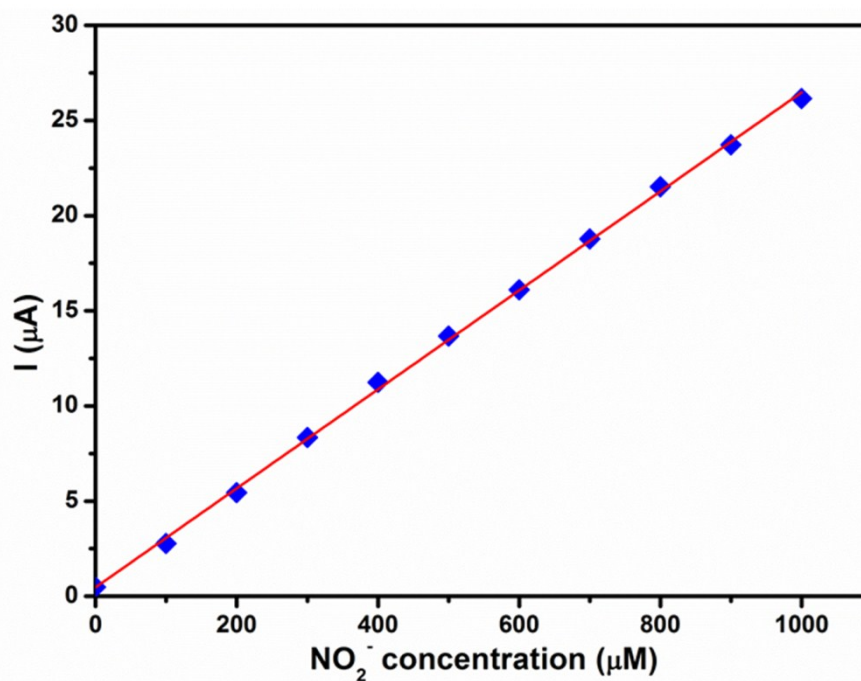

**Fig. S11:** Plot of peak current vs. nitrite concentration obtained for the ZnTiO<sub>3</sub>-TiO<sub>2</sub> composite thin film for each addition of 10  $\mu\text{M}$  nitrite in 0.1 M PBS (pH 7.2) at a scan rate of 50 mV s<sup>-1</sup>.

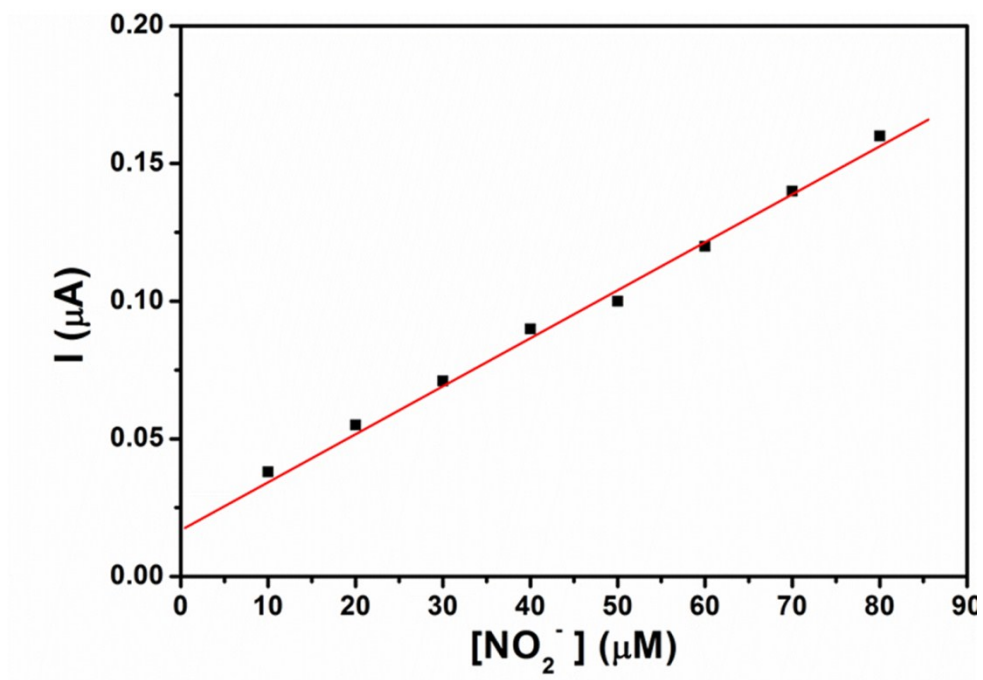

**Fig. S12:** Plot of peak current vs. nitrite concentration obtained for the ZnTiO<sub>3</sub>-TiO<sub>2</sub> composite thin film for various addition nitrite in 0.1 M PBS (pH 7.2) at a regular time interval of 60 sec (applied potential was +1.2 V).
